# Supplementary material for: Fluorescent probe for the detection of hypochlorous acid in water samples and cell models
Source: Royal Society of Chemistry journal article supplement (doi:10.1039/d1ra08116k), 2021-12-24
Supplement: d1ra08116k1.pdf [file d1ra08116k1.pdf]

SUPPORTING INFORMATION

**Fluorescent Probe for the Detection of Hypochlorous Acid in  
Water Samples and Cell Models**

Wandi Hu<sup>1</sup>, Mei Zhao<sup>1</sup>, Keyi Gu<sup>1</sup>, Lianwu Xie<sup>1</sup>, Mei Liu<sup>2</sup>, Danqing Lu<sup>1\*</sup>

<sup>1</sup> *College of Science, Central South University of Forestry and Technology, Changsha 410004,  
Hunan, China*

<sup>2</sup> *Ningyuan Environmental Protection Monitoring Station, Yongzhou 425600, Hunan, China*

- 1- **Table S1.** Summary of HClO fluorescent probe
- 2- **Figure S1:** Mass spectrum of compound 1
- 3- **Figure S2:** <sup>1</sup>HNMR of compound 1
- 4- **Figure S3:** <sup>13</sup>CNMR of compound 1
- 5- **Figure S4:** The probe BNA-HClO high resolution mass spectrometry
- 6- **Figure S5:** <sup>1</sup>HNMR of probe BNA-HClO
- 7- **Figure S6:** <sup>13</sup>CNMR of probe BNA-HClO
- 8- **Figure S7:** Absorption spectra of probe BNA-HClO and HClO before and after response.
- 9- **Figure S8:** Reverse high performance liquid chromatography with absorption as detection signal.
- 10- **Figure S9:** Cytotoxicity of higher concentration probe BNA-HClO.

Table S1 Summary of HClO fluorescent probe

| Probe                                                                               | Response time | Real water sample testing | test paper | Detection limit | Reference                                                       |
|-------------------------------------------------------------------------------------|---------------|---------------------------|------------|-----------------|-----------------------------------------------------------------|
| 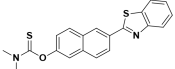   | Within 30 s   | Yes                       | Yes        | 37.56 nM        | This work                                                       |
|    | /             | No                        | No         | 2.7 nM          | Anal.Chem., 2020, 16, 11029-11034                               |
|    | 25 s; 45 s    | No                        | No         | 2.37 nM; 8.2 nM | Chem.Commun, 2018, 57, 7967-7970                                |
|    |               |                           |            |                 |                                                                 |
|    | /             | Yes                       | No         | /               | Sensors and Actuators B: Chemical, 2016, 232:300-305.           |
|    | /             | No                        | No         | 34.8 nM         | Chem.Commun, 2017,53,10800-10803                                |
|   | 3 s           | No                        | No         | 0.65 nM         | RSC Adv, 2019, 9, 4659-4664.                                    |
|  | Within 1 min  | No                        | No         | 0.9 nM          | Sensor and Actuators B: Chemical, 297, 15 2019, 126731.         |
|  | Within 1 min  | Yes                       | No         | 67 nM           | RSC Adv., 2016,6, 105795-105800.                                |
|  | 1 min         | Yes                       | No         | 94 nM           | New Journal of Chemistry, 2020,44, 6232-6237.                   |
|  | 1 min         | Yes                       | Yes        | 34.75 nM        | Spectrochim Acta A Mol Biomol Spectrosc. 2018, 5; 203: 415-420. |
|  | Within 10 s   | Yes                       | Yes        | 0.16 nM         | Chem Commun, 2018, 54, 8522-8525.                               |

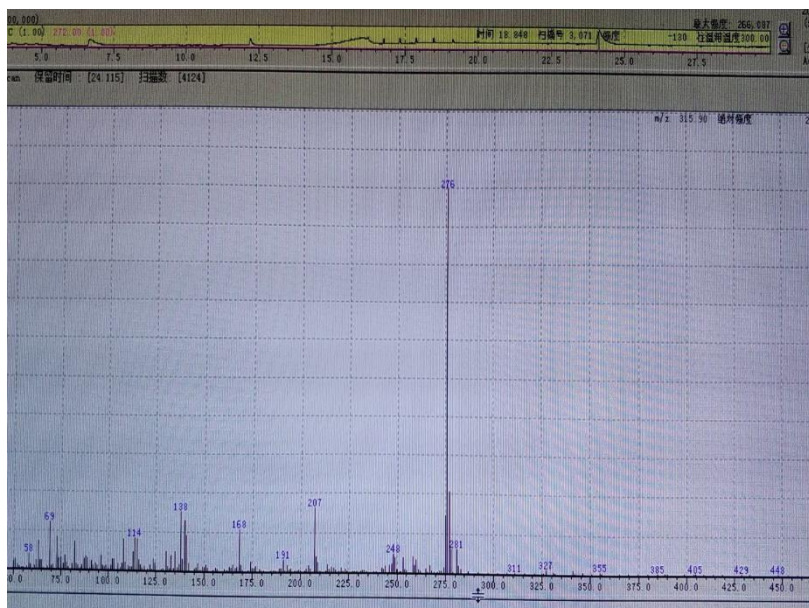

Figure. S1 Mass spectrum of compound 1

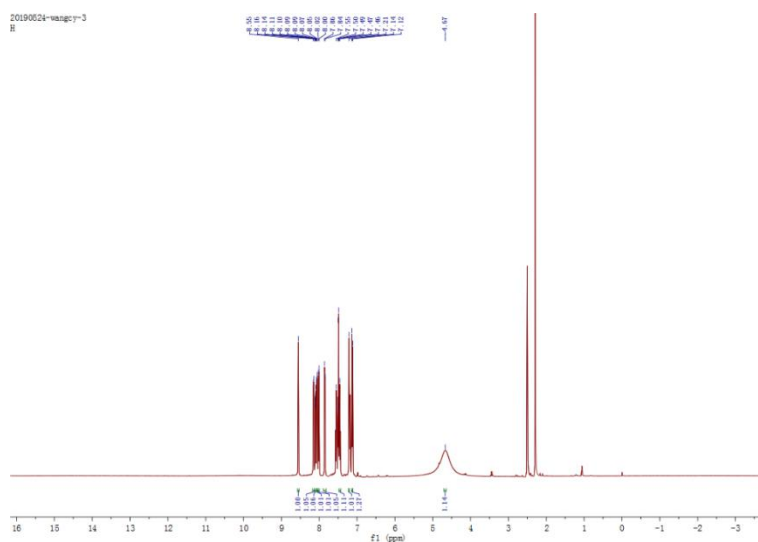

Figure. S2 <sup>1</sup>H NMR of compound 1

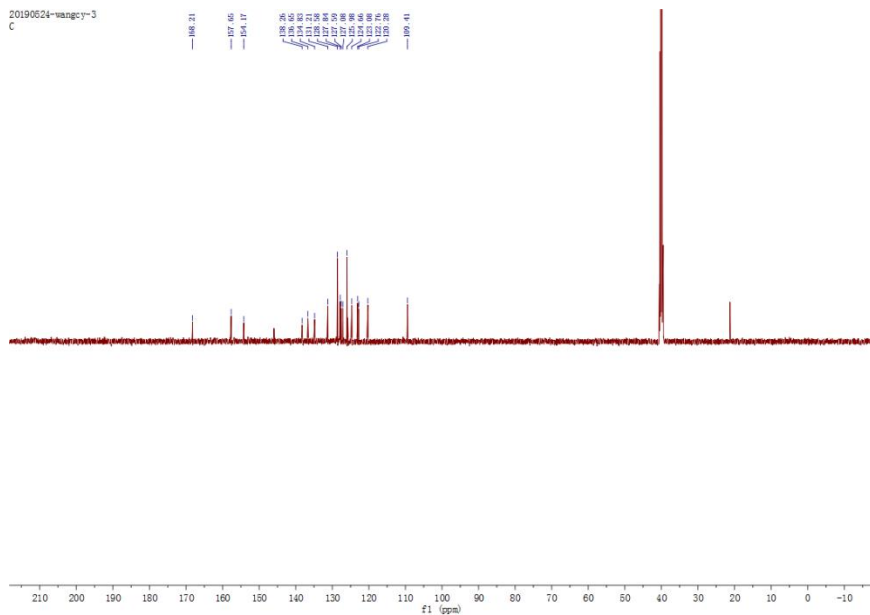

Figure. S3  $^{13}\text{C}$ NMR of compound 1

| Mass Spectrum List Report    |                            |                   |                                        |                       |                          |
|------------------------------|----------------------------|-------------------|----------------------------------------|-----------------------|--------------------------|
| <b>Analysis Info</b>         |                            |                   | Acquisition Date 10/21/2020 8:59:28 PM |                       |                          |
| Analysis Name                | D:\Data\HYYBS-J10_000381.d |                   | Operator                               | solarix               |                          |
| Method                       | 4_19_MassAccuNeg           |                   | Instrument                             |                       |                          |
| Sample Name                  | 58                         |                   | Comment                                |                       |                          |
| <b>Acquisition Parameter</b> |                            |                   |                                        |                       |                          |
| Polarity                     | Positive                   | n/a               | n/a                                    | No. of Laser Shots    | 200                      |
| n/a                          | n/a                        | No. of Cell Fills | 1                                      | Laser Power           | 20.0 Ip                  |
| Broadband Low Mass           | 53.9 m/z                   | n/a               | n/a                                    | n/a                   | n/a                      |
| Broadband High Mass          | 500.0 m/z                  | n/a               | n/a                                    | n/a                   | n/a                      |
| Acquisition Mode             | Single MS                  | n/a               | n/a                                    | Calibration Date      | Fri Feb 21 02:36:54 2014 |
| Pulse Program                | basic                      | n/a               | n/a                                    | Data Acquisition Size | 1048576                  |
| Source Accumulation          | 0.020 sec                  | n/a               | n/a                                    | Apodization           | Sine-Bell Multiplication |
| Ion Accumulation Time        | 0.200 sec                  | n/a               | n/a                                    | Apodization           | Apodization              |
| Flight Time to Acq. Cell     | 0.001 sec                  | n/a               | n/a                                    |                       |                          |

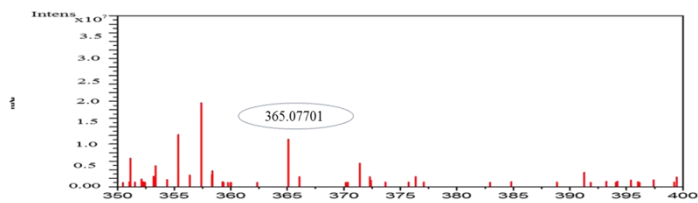

Figure S4 The probe BNA-HClO high resolution mass spectrometry

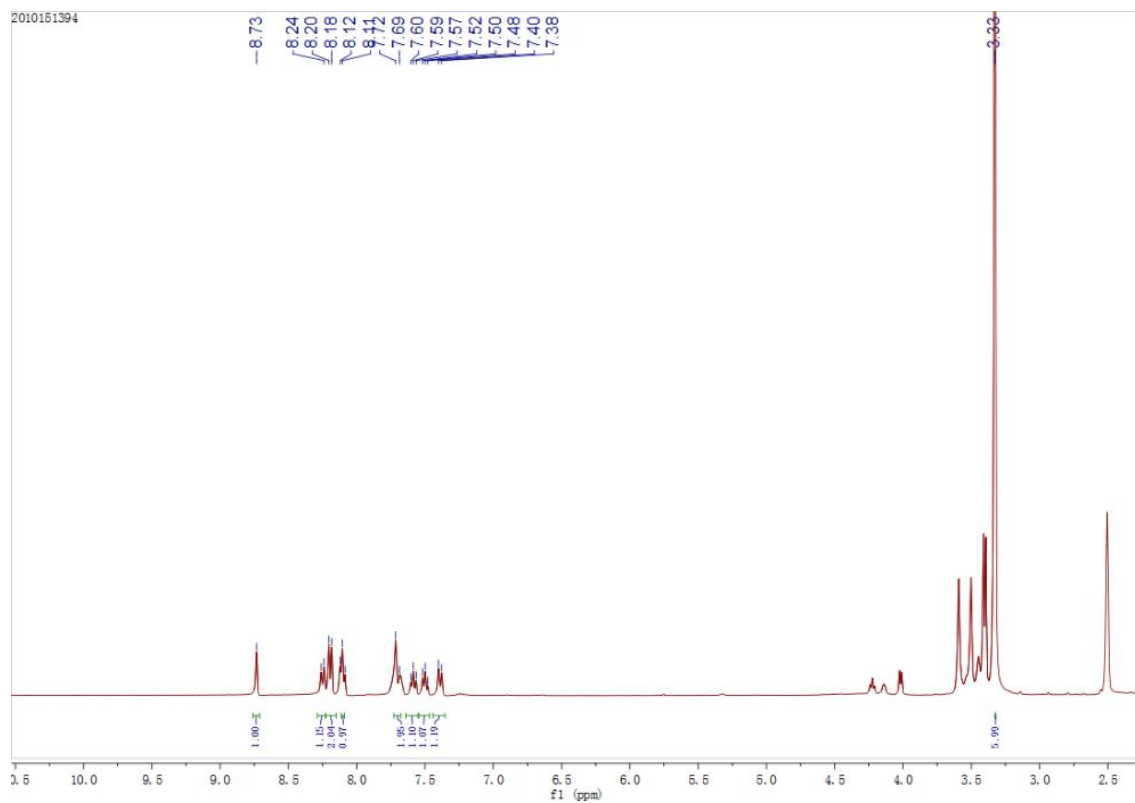

Figure. S5  $^1\text{H}$ NMR of probe BNA-HClO

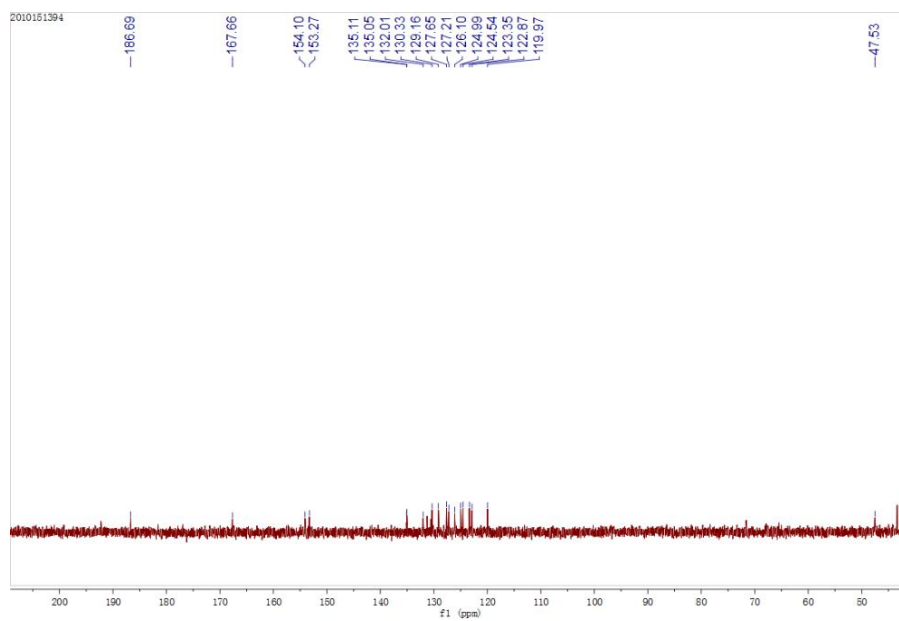

Figure. S6  $^{13}\text{C}$ NMR of probe BNA-HClO

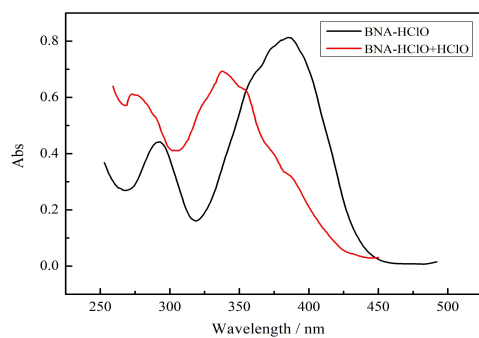

Figure. S7 Absorption spectra of probe BNA-HClO and HClO before and after response.

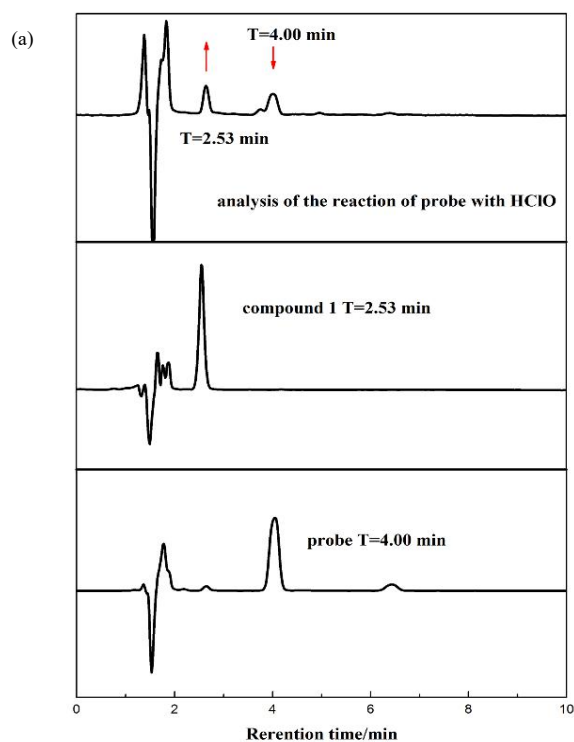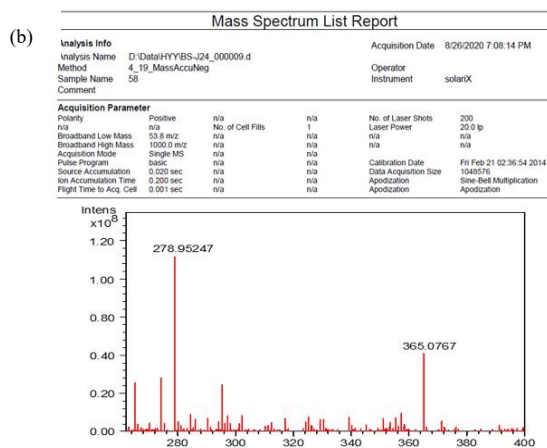

Figure. S8 (a) Reverse high performance liquid chromatography with absorption as detection signal. From top to bottom, the probe ( $10 \mu\text{mol}\cdot\text{L}^{-1}$ ) reacts with HClO ( $100 \mu\text{mol}\cdot\text{L}^{-1}$ ) for 1 min; compound 1 ( $1 \text{ mmol}\cdot\text{L}^{-1}$ ); probe BNA-HClO ( $1 \text{ mmol}\cdot\text{L}^{-1}$ ). (b) High-resolution mass spectrum of the system after the probe responds to HClO.

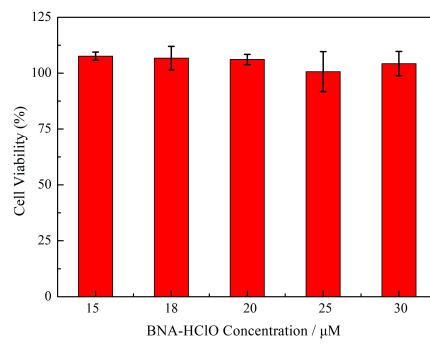

Figure. S9 Cytotoxicity of higher concentration probe BNA-HClO.
